# Supplementary material
Source: publisher site journal article supplement (https://www.dovepress.com/article/573334)
Supplement: Supplementary file 1 [file 573334%20Supplementary.docx]

Supplementary Material


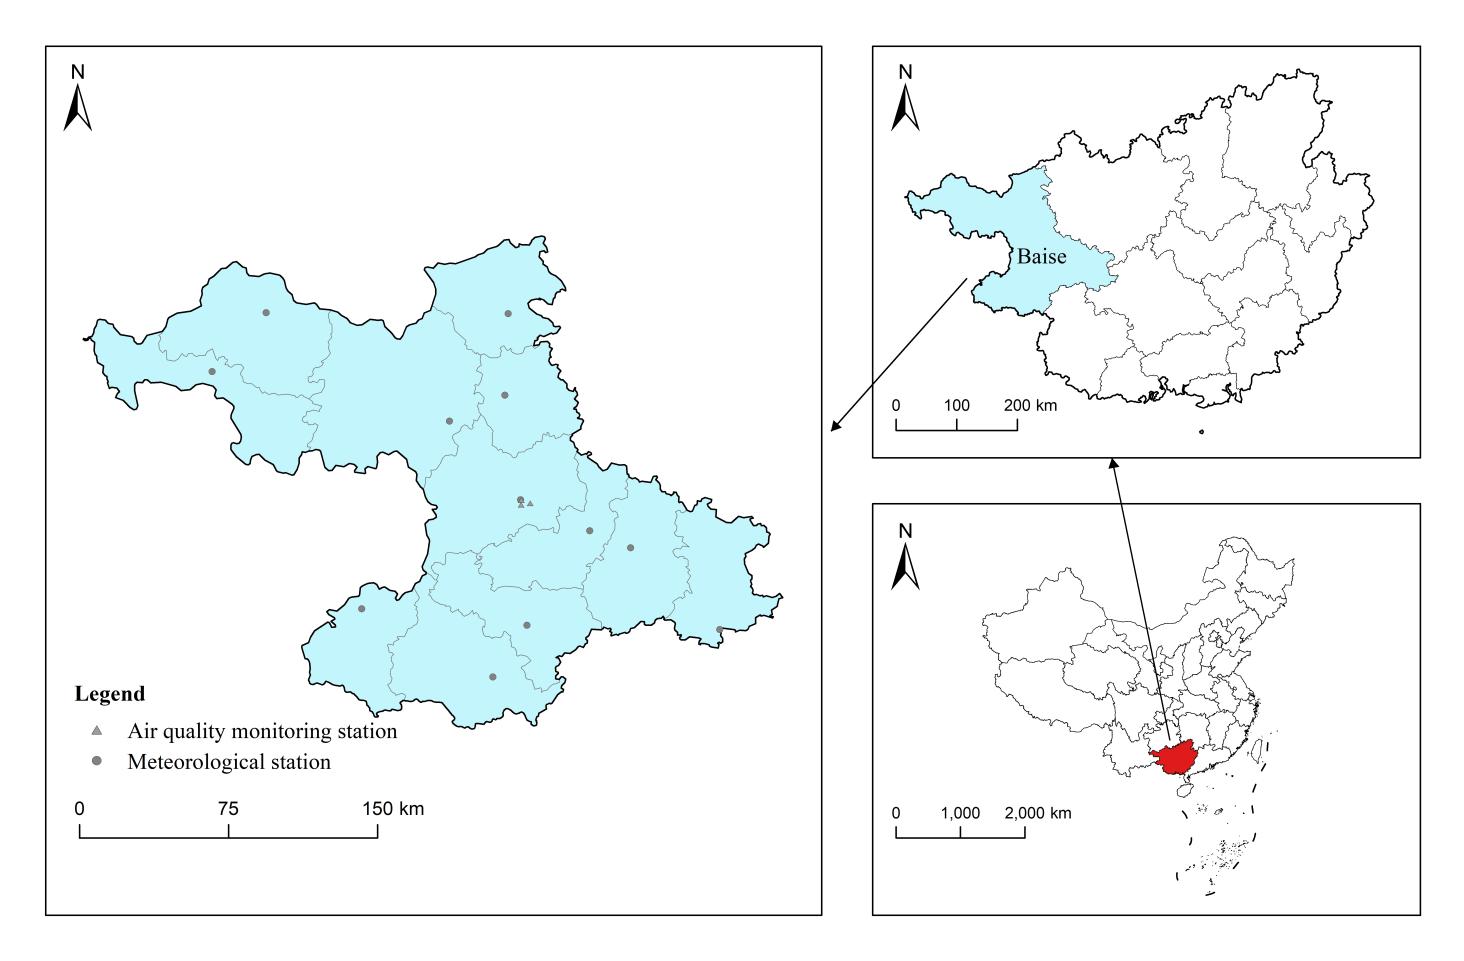


Figure S1 Locations of air pollutant monitoring stations and the meteorological station in Baise, Guangxi, China

Table S1 Relative risk (95% CI) of hypertension-related visits by sex at different lag days for each 10 µg/m3 increase in air pollutant concentration (each 100 μg/m3 increase in CO) in a single-pollutant model

| Sex | Lag days | PM2.5 | PM10 | NO2 | CO |
| --- | --- | --- | --- | --- | --- |
| Male | lag0 | 1.008(0.997,1.019) | **1.009(1.001,1.016)*** | **1.050(1.017,1.083)*** | **1.014(1.001,1.026)*** |
|  | lag1 | 1.002(0.997,1.007) | 1.002(0.999,1.006) | **1.017(1.003,1.032)*** | 1.005(0.999,1.011) |
|  | lag2 | 1.002(0.996,1.008) | 1.001(0.997,1.006) | 1.008(0.990,1.027) | 1.002(0.995,1.009) |
|  | lag3 | 1.005(0.999,1.010) | 1.003(0.999,1.006) | 1.012(0.998,1.027) | 1.003(0.997,1.009) |
|  | lag4 | **1.008(1.003,1.013)*** | **1.006(1.002,1.009)*** | **1.021(1.006,1.035)*** | 1.004(0.998,1.009) |
|  | lag5 | **1.008(1.002,1.014)*** | **1.006(1.002,1.011)*** | **1.024(1.005,1.043)*** | 1.002(0.995,1.009) |
|  | lag6 | 1.003(0.998,1.008) | 1.003(0.999,1.007) | 1.013(0.998,1.027) | 0.994(0.988,1.000) |
|  | lag7 | 0.990(0.979,1.001) | 0.994(0.986,1.002) | 0.978(0.948,1.010) | 0.978(0.966,0.990) |
|  | lag01 | 1.010(0.997,1.022) | **1.011(1.002,1.020)*** | **1.068(1.032,1.106)*** | **1.019(1.005,1.033)*** |
|  | lag02 | 1.012(0.999,1.025) | **1.012(1.003,1.021)*** | **1.077(1.040,1.115)*** | **1.021(1.007,1.036)*** |
|  | lag03 | **1.017(1.004,1.031)*** | **1.015(1.006,1.025)*** | **1.090(1.051,1.131)*** | **1.024(1.009,1.040)*** |
|  | lag04 | **1.025(1.011,1.040)*** | **1.021(1.011,1.031)*** | **1.113(1.072,1.155)*** | **1.028(1.012,1.044)*** |
|  | lag05 | **1.033(1.017,1.049)*** | **1.027(1.016,1.038)*** | **1.139(1.094,1.186)*** | **1.030(1.013,1.046)*** |
|  | lag06 | **1.036(1.019,1.054)*** | **1.031(1.018,1.043)*** | **1.154(1.106,1.203)*** | **1.023(1.006,1.041)*** |
|  | lag07 | **1.026(1.009,1.043)*** | **1.024(1.013,1.036)*** | **1.129(1.088,1.171)*** | 1.001(0.986,1.016) |
| Female | lag0 | 1.012(0.999,1.024) | **1.012(1.003,1.021)*** | **1.062(1.025,1.100)*** | **1.015(1.001,1.029)*** |
|  | lag1 | **1.007(1.001,1.012)*** | **1.005(1.001,1.009)*** | **1.034(1.018,1.051)*** | **1.010(1.003,1.016)*** |
|  | lag2 | 1.003(0.996,1.010) | 1.002(0.997,1.007) | 1.018(0.997,1.039) | 1.006(0.998,1.013) |
|  | lag3 | 1.001(0.996,1.007) | 1.001(0.997,1.005) | 1.010(0.994,1.026) | 1.002(0.996,1.009) |
|  | lag4 | 1.001(0.995,1.006) | 1.001(0.997,1.005) | 1.006(0.990,1.022) | 1.000(0.994,1.006) |
|  | lag5 | 1.001(0.994,1.008) | 1.002(0.997,1.007) | 1.004(0.983,1.025) | 0.997(0.989,1.005) |
|  | lag6 | 1.001(0.995,1.007) | 1.001(0.998,1.005) | 1.001(0.984,1.017) | 0.995(0.988,1.001) |
|  | lag7 | 1.001(0.989,1.014) | 0.999(0.990,1.008) | 0.992(0.958,1.028) | 0.992(0.978,1.005) |
|  | lag01 | **1.019(1.005,1.033)*** | **1.017(1.007,1.027)*** | **1.098(1.057,1.141)*** | **1.025(1.009,1.041)*** |
|  | lag02 | **1.022(1.008,1.036)*** | **1.019(1.009,1.029)*** | **1.118(1.075,1.162)*** | **1.030(1.014,1.047)*** |
|  | lag03 | **1.023(1.008,1.039)*** | **1.020(1.009,1.030)*** | **1.129(1.083,1.176)*** | **1.033(1.016,1.050)*** |
|  | lag04 | **1.024(1.008,1.040)*** | **1.021(1.010,1.032)*** | **1.136(1.089,1.184)*** | **1.033(1.015,1.050)*** |
|  | lag05 | **1.025(1.007,1.043)*** | **1.023(1.010,1.036)*** | **1.140(1.090,1.193)*** | **1.030(1.012,1.049)*** |
|  | lag06 | **1.026(1.007,1.045)*** | **1.024(1.011,1.038)*** | **1.141(1.088,1.196)*** | **1.025(1.005,1.044)*** |
|  | lag07 | **1.027(1.008,1.047)*** | **1.023(1.010,1.036)*** | **1.132(1.087,1.180)*** | 1.016(0.999,1.033) |

Note: Bold indicates statistically significant results (**P* < 0.05).

Table S2 Relative risk (95% CI) of hypertension-related visits stratified by age at different lag days for each 10 µg/m3 increase in air pollutant concentration (each 100 μg/m3 increase in CO) in a single-pollutant model

| Age | Lag days | PM2.5 | PM10 | NO2 | CO |
| --- | --- | --- | --- | --- | --- |
| ＜65 years old | lag0 | 1.007(0.996,1.019) | **1.008(1.001,1.016)*** | **1.050(1.018,1.084)*** | **1.013(1.001,1.026)*** |
|  | lag1 | 1.005(0.999,1.010) | **1.004(1.001,1.007)*** | **1.026(1.011,1.041)*** | **1.008(1.002,1.014)*** |
|  | lag2 | 1.004(0.998,1.011) | 1.002(0.998,1.007) | 1.014(0.995,1.034) | 1.005(0.998,1.012) |
|  | lag3 | 1.005(0.999,1.010) | 1.003(0.999,1.006) | 1.011(0.997,1.026) | 1.003(0.998,1.009) |
|  | lag4 | **1.005(1.001,1.010)*** | **1.004(1.001,1.008)*** | 1.012(0.997,1.027) | 1.001(0.996,1.007) |
|  | lag5 | 1.005(0.998,1.011) | 1.004(0.999,1.009) | 1.012(0.993,1.031) | 0.998(0.991,1.006) |
|  | lag6 | 1.002(0.997,1.007) | 1.002(0.999,1.006) | 1.008(0.993,1.023) | 0.994(0.988,1.000) |
|  | lag7 | 0.996(0.985,1.007) | 0.997(0.989,1.004) | 0.994(0.963,1.026) | 0.987(0.975,0.999) |
|  | lag01 | 1.012(0.999,1.025) | **1.012(1.003,1.021)*** | **1.077(1.040,1.116)*** | **1.021(1.007,1.036)*** |
|  | lag02 | **1.017(1.004,1.030)*** | **1.014(1.005,1.023)*** | **1.093(1.055,1.132)*** | **1.027(1.012,1.042)*** |
|  | lag03 | **1.022(1.008,1.036)*** | **1.017(1.008,1.027)*** | **1.105(1.064,1.147)*** | **1.030(1.015,1.046)*** |
|  | lag04 | **1.027(1.012,1.042)*** | **1.021(1.011,1.031)*** | **1.118(1.077,1.162)*** | **1.032(1.016,1.048)*** |
|  | lag05 | **1.032(1.016,1.048)*** | **1.026(1.014,1.037)*** | **1.132(1.087,1.179)*** | **1.030(1.013,1.047)*** |
|  | lag06 | **1.034(1.016,1.051)*** | **1.028(1.016,1.041)*** | **1.141(1.093,1.191)*** | **1.024(1.006,1.041)*** |
|  | lag07 | **1.029(1.012,1.047)*** | **1.025(1.013,1.036)*** | **1.134(1.092,1.177)*** | 1.010(0.995,1.026) |
| ≥65 years old | lag0 | 1.012(0.999,1.024) | **1.012(1.004,1.021)*** | **1.061(1.025,1.099)*** | **1.016(1.002,1.029)*** |
|  | lag1 | 1.004(0.998,1.009) | 1.003(0.999,1.007) | **1.024(1.008,1.041)*** | 1.006(0.999,1.012) |
|  | lag2 | 1.001(0.994,1.008) | 1.000(0.996,1.005) | 1.011(0.991,1.032) | 1.002(0.995,1.010) |
|  | lag3 | 1.002(0.996,1.007) | 1.001(0.997,1.005) | 1.011(0.995,1.027) | 1.002(0.996,1.008) |
|  | lag4 | 1.004(0.998,1.009) | 1.003(0.999,1.007) | 1.016(0.999,1.033) | 1.003(0.996,1.009) |
|  | lag5 | 1.005(0.998,1.012) | 1.004(0.999,1.008) | 1.018(0.997,1.039) | 1.001(0.993,1.009) |
|  | lag6 | 1.002(0.997,1.008) | 1.003(0.999,1.007) | 1.006(0.990,1.023) | 0.995(0.988,1.001) |
|  | lag7 | 0.994(0.982,1.007) | 0.996(0.987,1.004) | 0.974(0.941,1.009) | 0.981(0.968,0.995) |
|  | lag01 | **1.015(1.002,1.029)*** | **1.016(1.006,1.026)*** | **1.087(1.046,1.129)*** | **1.022(1.006,1.037)*** |
|  | lag02 | **1.016(1.002,1.031)*** | **1.016(1.007,1.026)*** | **1.099(1.057,1.142)*** | **1.024(1.008,1.040)*** |
|  | lag03 | **1.018(1.003,1.034)*** | **1.017(1.007,1.028)*** | **1.111(1.067,1.158)*** | **1.026(1.009,1.043)*** |
|  | lag04 | **1.022(1.006,1.038)*** | **1.020(1.009,1.031)*** | **1.129(1.084,1.177)*** | **1.029(1.012,1.046)*** |
|  | lag05 | **1.027(1.009,1.045)*** | **1.025(1.012,1.037)*** | **1.149(1.099,1.202)*** | **1.030(1.011,1.048)*** |
|  | lag06 | **1.029(1.010,1.049)*** | **1.027(1.014,1.041)*** | **1.157(1.104,1.212)*** | **1.024(1.005,1.044)*** |
|  | lag07 | **1.023(1.005,1.042)*** | **1.023(1.010,1.036)*** | **1.127(1.082,1.174)*** | 1.005(0.988,1.022) |

Note: Bold indicates statistically significant results (**P* < 0.05)

Table S3 Relative risk (95% CI) of hypertension-related visits stratified by season at different lag days for each 10 µg/m3 increase in air pollutant concentration (each 100 μg/m3 increase in CO) in a single-pollutant model

| Season | Lag days | PM2.5 | PM10 | NO2 | CO |
| --- | --- | --- | --- | --- | --- |
| Cold | lag0 | 1.010(0.997,1.024) | **1.011(1.001,1.020)*** | **1.062(1.024,1.101)*** | **1.019(1.004,1.034)*** |
|  | lag1 | 1.005(0.999,1.011) | 1.004(0.999,1.008) | **1.027(1.010,1.045)*** | **1.009(1.002,1.016)*** |
|  | lag2 | 1.004(0.997,1.011) | 1.002(0.997,1.008) | 1.015(0.993,1.037) | 1.005(0.996,1.014) |
|  | lag3 | 1.005(0.999,1.011) | 1.004(0.999,1.008) | 1.014(0.998,1.032) | 1.004(0.997,1.010) |
|  | lag4 | **1.006(1.001,1.012)*** | **1.005(1.001,1.009)*** | **1.019(1.002,1.036)*** | 1.003(0.996,1.010) |
|  | lag5 | 1.005(0.998,1.013) | **1.006(1.001,1.011)*** | 1.019(0.998,1.042) | 1.001(0.991,1.009) |
|  | lag6 | 1.001(0.995,1.007) | 1.002(0.998,1.006) | 1.008(0.991,1.026) | 0.994(0.987,1.001) |
|  | lag7 | 0.991(0.978,1.005) | 0.993(0.984,1.002) | 0.978(0.943,1.014) | 0.980(0.966,0.995) |
|  | lag01 | **1.016(1.001,1.031)*** | **1.015(1.004,1.026)*** | **1.091(1.048,1.136)*** | **1.028(1.011,1.046)*** |
|  | lag02 | **1.020(1.004,1.036)*** | **1.018(1.007,1.029)*** | **1.107(1.063,1.153)*** | **1.033(1.016,1.051)*** |
|  | lag03 | **1.025(1.008,1.042)*** | **1.021(1.010,1.033)*** | **1.123(1.075,1.172)*** | **1.037(1.019,1.056)*** |
|  | lag04 | **1.032(1.014,1.050)*** | **1.027(1.014,1.039)*** | **1.144(1.095,1.194)*** | **1.040(1.022,1.059)*** |
|  | lag05 | **1.037(1.017,1.057)*** | **1.032(1.018,1.046)*** | **1.166(1.113,1.221)*** | **1.041(1.021,1.061)*** |
|  | lag06 | **1.038(1.017,1.060)*** | **1.034(1.019,1.050)*** | **1.176(1.120,1.234)*** | **1.034(1.013,1.056)*** |
|  | lag07 | **1.029(1.008,1.051)*** | **1.027(1.013,1.042)*** | **1.150(1.101,1.200)*** | 1.014(0.995,1.033) |
| Warm | lag0 | 1.010(0.991,1.029) | 1.008(0.995,1.021) | 1.023(0.965,1.085) | 1.004(0.986,1.023) |
|  | lag1 | 0.997(0.988,1.007) | 0.998(0.992,1.004) | 0.999(0.971,1.029) | 0.999(0.990,1.009) |
|  | lag2 | 0.993(0.982,1.004) | 0.994(0.987,1.001) | 0.988(0.956,1.022) | 0.998(0.987,1.008) |
|  | lag3 | 0.994(0.985,1.003) | 0.995(0.989,1.001) | 0.985(0.960,1.012) | 0.998(0.989,1.007) |
|  | lag4 | 0.998(0.989,1.006) | 0.998(0.993,1.004) | 0.988(0.962,1.015) | 0.999(0.991,1.009) |
|  | lag5 | 1.002(0.992,1.013) | 1.001(0.995,1.008) | 0.994(0.961,1.027) | 1.001(0.990,1.011) |
|  | lag6 | 1.005(0.996,1.014) | 1.003(0.997,1.009) | 0.999(0.972,1.027) | 0.999(0.990,1.009) |
|  | lag7 | 1.004(0.986,1.022) | 1.001(0.988,1.012) | 1.001(0.946,1.059) | 0.995(0.976,1.014) |
|  | lag01 | 1.007(0.984,1.031) | 1.006(0.990,1.022) | 1.023(0.953,1.098) | 1.004(0.981,1.027) |
|  | lag02 | 1.001(0.976,1.025) | 1.001(0.983,1.017) | 1.011(0.937,1.091) | 1.001(0.977,1.026) |
|  | lag03 | 0.994(0.968,1.021) | 0.995(0.977,1.014) | 0.996(0.918,1.081) | 0.999(0.974,1.026) |
|  | lag04 | 0.992(0.964,1.020) | 0.993(0.974,1.013) | 0.985(0.904,1.072) | 0.999(0.973,1.026) |
|  | lag05 | 0.994(0.964,1.024) | 0.994(0.974,1.016) | 0.978(0.892,1.073) | 0.999(0.972,1.028) |
|  | lag06 | 0.999(0.967,1.032) | 0.997(0.974,1.020) | 0.977(0.885,1.079) | 0.999(0.972,1.028) |
|  | lag07 | 1.002(0.968,1.037) | 0.997(0.973,1.022) | 0.978(0.886,1.079) | 0.994(0.969,1.020) |

Note: Bold indicates statistically significant results (**P* < 0.05).

Table S4 The RR (95% CI) of hospital admissions for hypertension associated with a 10μg/ m3 (and 100μg/m3 in CO) increment in ambient air pollutant concentrations in two-pollutant models.

| Two-pollutants models | Lag 07 day | Two-pollutants models | Lag 07 day |
| --- | --- | --- | --- |
| PM2.5 | 1.027(1.011,1.043) | PM10 | 1.024(1.013,1.035) |
| PM2.5+SO2 | 1.022(1.005,1.039) | PM10+SO2 | 1.020(1.009,1.032) |
| PM2.5+CO | 1.022(1.002,1.042) | PM10+CO | 1.023(1.010,1.037) |
| PM2.5+O38h | 1.022(1.007,1.038) | PM10+O38h | 1.020(1.009,1.031) |
| NO2 | 1.130(1.092,1.170) | CO | 1.008(0.994,1.022) |
| NO2+SO2 | 1.126(1.084,1.171) | CO+PM2.5 | 0.997(0.980,1.014) |
| NO2+CO | 1.145(1.099,1.193) | CO+PM10 | 0.993(0.976,1.009) |
| NO2+O38h | 1.097(1.061,1.134) | CO+SO2 | 1.010(0.996,1.024) |
|  |  | CO+NO2 | 0.989(0.974,1.005) |
|  |  | CO+O38h | 1.010(0.996,1.023  ) |

Table S5Sensitivity analysis of time freedom degree change.

| Variables | df | | | | |
| --- | --- | --- | --- | --- | --- |
| 6 | 7 | 8 | 9 | 10 |
| PM2.5 | 1.027(1.011,1.043) | 1.027(1.011,1.043) | 1.027(1.011,1.043) | 1.027(1.011,1.043) | 1.027(1.011,1.043) |
| PM10 | 1.024(1.013,1.035) | 1.024(1.013,1.035) | 1.024(1.013,1.035) | 1.024(1.013,1.035) | 1.024(1.013,1.035) |
| NO2 | 1.130(1.092,1.170) | 1.130(1.092,1.170) | 1.130(1.092,1.170) | 1.130(1.092,1.170) | 1.130(1.092,1.170) |
| CO | 1.008(0.994,1.022) | 1.008(0.994,1.022) | 1.008(0.994,1.022) | 1.008(0.994,1.022) | 1.008(0.994,1.022) |
